# Supplementary material
Source: PubMed Central journal article supplement (PMC1462968)
Supplement: 7601101s1.pdf [file 7601101s1.pdf]

## Supplemental Material:

### Antibodies list:

p89, cycH (Austral Biotech), Pol II (Babco, 8WG16), Brg1 (J2 fraction), E2F1 (SC-22820), E2F4 (SC-866), TCF4 (SC-13027), H4 (Upstate 07-108), Sp1 (Upstate 07-124) and YY1 (SC-1703), FBP3 (SC-11103).

### Primer List:

#### Primers for ChIP:

P2: Forward: GGATCGCGCTGAGTATAAAAGCCG  
Reverse: GTTGTAAGTTCCAGTGCAAAGTGCC  
FUSE: Forward: GCAGTGCATCGGATTTGGAAGCTA  
Reverse: CGCTTCGACTCAGCTAGTTGCCCA  
Mid: Forward: ACGCGCTCTCCAAGTATACGTGG  
Reverse: TAAATCATCGCAGGCGGAACAGCT

#### Primers for DNA-IP:

Forward: GGCCGCATAACTTCGTATAGCATA  
Reverse: ATGACCTCAGAACTCCATCTGGAT

#### Primers for LM-PCR:

Linker primers:

Forward: GGGGTGACCCGGGAGATCTGAATTC  
Reverse: GAATTCAGATC

KMnO<sub>4</sub>, bottom strand primers:

Amplification primer: GAGGTGGTGGAGGGAGAGAAAAG  
Labeling primer: GGTGGAGGGAGAGAAAAGTTTACTTAAAATGCC

#### MNase nucleosome mapping:

5' boundary:

Amplification primer: ACTCAGCTAGTTGCCAGCCCCA  
Labeling primer: GCTAGTTGCCAGCCCCACACATGAT

3' boundary used same primer set as in KMnO<sub>4</sub> experiments.

#### Amplification primers for qRT-PCR (Roche Universal Probe Library Probes):

*c-myc*: Forward: TGCTCCATGAGGAGACACC  
Reverse: TCGATTTCTTCCTCATCTTCTTG  
!-tubulin: Forward: CAGTGCGGCAACCAGATT  
Reverse: ACGTCCTTGCGGTCAGTG

#### Primers to amplify probe for Southern blot:

Forward: TGGGGCTGGGCAACTAGCTGAGT  
Reverse: TACCCGAACCGCGGGACCGGACTTCCTA

#### siRNA:

Stealth siRNA to FIR: UAGUAGAUAGAGCCCCACGUAGACGC  
Stealth siRNA to FBP: AAUUUCUGCAGCAUGUUGACAUCGG

## Supplemental Figure

S1.

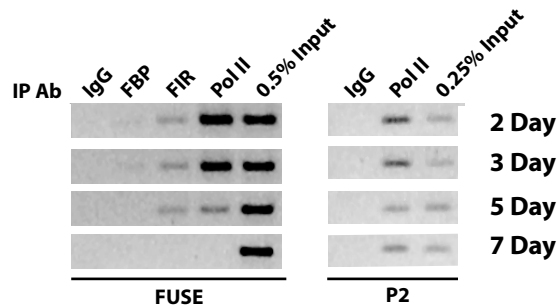

S2.

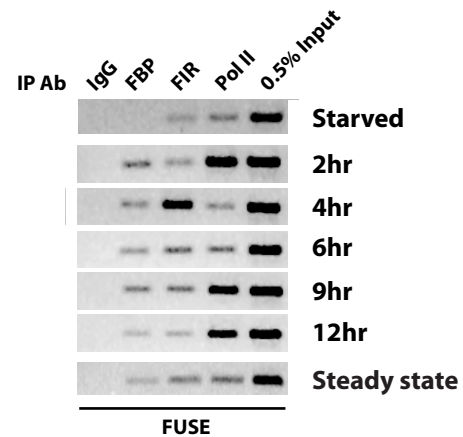

### Supplemental Figure legend:

ChIP with serum starved and re-stimulated Hs68 cells.

S1. After the indicated time of starvation, Hs68 cells were fixed and then chromatin was immunoprecipitated and PCR amplified with both FUSE and P2 primer sets.

S2. After 5 days of starvation, serum was added back to Hs68 cells. Cells were fixed and harvested at the indicated time points post serum induction. ChIP was performed with indicated antibodies and the precipitated DNA was PCR amplified FUSE primers. Hs68 cells undergoing steady state growth were also subjected to the same ChIP and PCR.
